# Supplementary material for: Critical behavior of the quasi-two-dimensional semiconducting ferromagnet CrSiTe3
Source: PubMed Central journal article supplement (PMC5030636; doi:10.1038/srep33873), 2016-09-21
Supplement: srep33873-s1.pdf [file srep33873-s1.pdf]

## Supplementary Information

### Critical behavior of the quasi-two-dimensional semiconducting ferromagnet CrSiTe<sub>3</sub>

Bingjie Liu,<sup>1,2</sup> Youming Zou,<sup>1</sup> Lei Zhang,<sup>1</sup> Shiming Zhou,<sup>3</sup> Zhe Wang,<sup>1,2</sup> Weike Wang,<sup>1</sup> Zhe Qu,<sup>1,\*</sup> and Yuheng Zhang<sup>1,3</sup>

1. High Magnetic Field Laboratory, Chinese Academy of Sciences, Hefei, Anhui 230031, China.
2. University of Science and Technology of China, Hefei, Anhui 230026, China.
3. Hefei National Laboratory for Physical Sciences at Microscale, University of Science and Technology of China, Hefei, Anhui 230026, China.

Correspondence and requests for materials should be addressed to Z. Q. (email: [zhequ@hmfl.ac.cn](mailto:zhequ@hmfl.ac.cn))

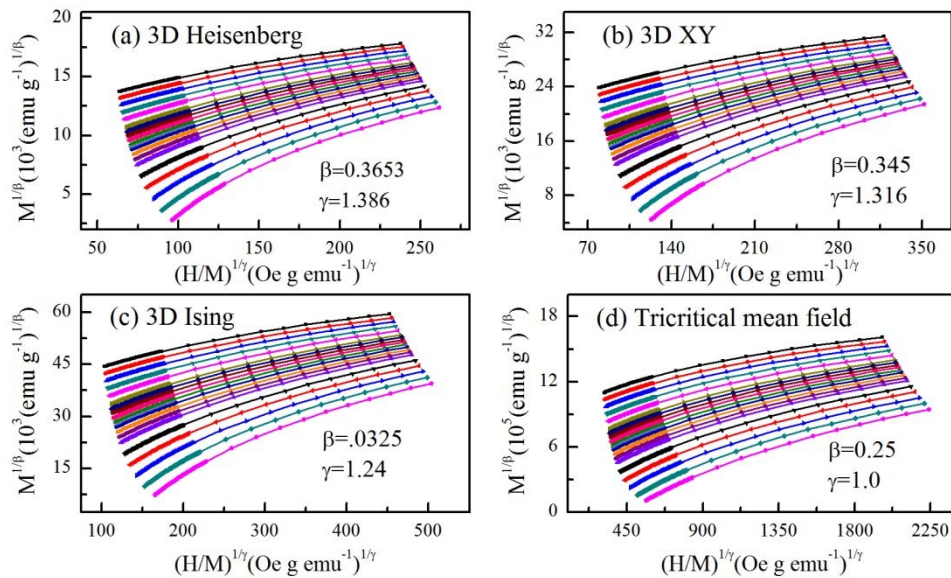

**Figure S1.** The isotherms replotted as  $M^{1/\beta}$  vs.  $(H/M)^{1/\gamma}$  with (a) 3D-Heisenberg model; (b) 3D-XY model; (c) 3D-Ising model; (d) tricritical mean-field model.

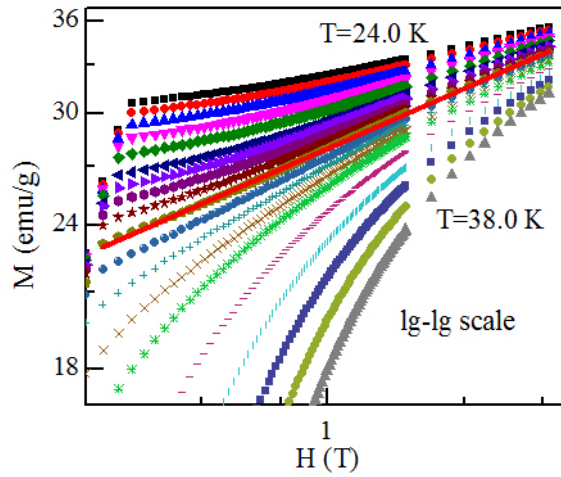

**Figure S2.** The isotherms replotted in lg-lg scale. The red solid line represents the fitting result to MH data at 31.0 K.

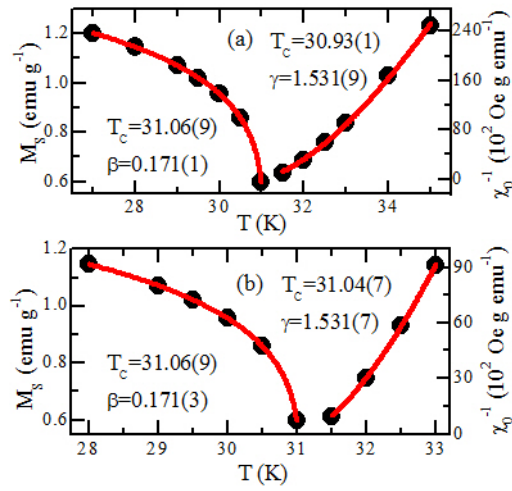

**Figure 2.** Temperature variation in spontaneous magnetization  $M_s(T)$  (left axis) and inverse initial susceptibility  $\chi_0^{-1}(T)$  (right axis) which are obtained from the high-field extrapolation of modified Arrott plot. The red solid lines represent the fitting to Eqs. 1 and 2 with **(a)**  $\Delta T/T_c = 0.15$  and **(b)**  $\Delta T/T_c = 0.10$ , respectively.

| $\Delta T/T_C$ |           | $\beta$           | $\gamma$          | $T_C$ (K)        |
|----------------|-----------|-------------------|-------------------|------------------|
| 0.20           | $T < T_C$ | $0.170 \pm 0.008$ |                   | $31.06 \pm 0.09$ |
|                | $T > T_C$ |                   | $1.532 \pm 0.001$ | $30.83 \pm 0.09$ |
| 0.15           | $T < T_C$ | $0.171 \pm 0.001$ |                   | $31.06 \pm 0.09$ |
|                | $T > T_C$ |                   | $1.531 \pm 0.009$ | $30.93 \pm 0.01$ |
| 0.10           | $T < T_C$ | $0.171 \pm 0.003$ |                   | $31.06 \pm 0.09$ |
|                | $T > T_C$ |                   | $1.531 \pm 0.007$ | $31.04 \pm 0.07$ |

**Table I.** The critical exponents and the critical temperature of CrSiTe<sub>3</sub> determined by MAP technique with different  $\Delta T/T_C$  values.
